# Supplementary material for: Interferon gamma (IFN-γ) negative CD4+ and CD8+ T-cells can produce immune mediators in response to viral antigens
Source: PubMed Central journal article supplement — Vaccine. 2019 Jan 3;37(1):113–22. doi: 10.1016/j.vaccine.2018.11.024 (PMC6290111; doi:10.1016/j.vaccine.2018.11.024), 2019-01-03

Supplimentary figures 1A:

ConM group specific peptides can detect for HIV Specific responses at similar frequencies as ConA and ConD clade specific peptides in CD4+ T-cells

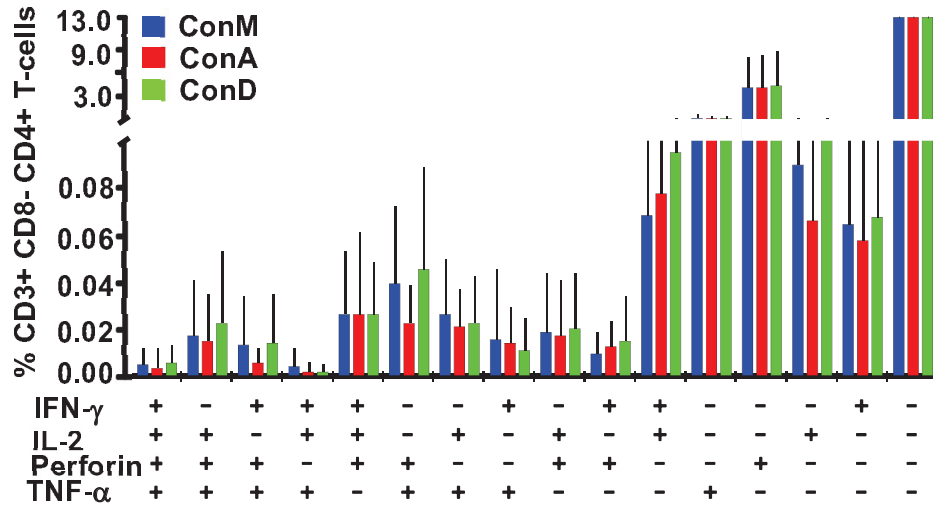

Student's t-Test Results

| Category | Antigen: ConA | Antigen: ConD |
|----------|---------------|---------------|
| + + + +  | 0.710         | 0.754         |
| - + + +  | 0.812         | 0.676         |
| + - + +  | 0.256         | 0.964         |
| + + - +  | 0.361         | 0.285         |
| + + + -  | 0.990         | 0.986         |
| - - + +  | 0.180         | 0.717         |
| - + - +  | 0.580         | 0.707         |
| + - - +  | 0.880         | 0.666         |
| - + + -  | 0.858         | 0.897         |
| + - + -  | 0.484         | 0.410         |
| + + - -  | 0.829         | 0.547         |
| - - - +  | 0.838         | 0.796         |
| - - + -  | 0.969         | 0.862         |
| - + - -  | 0.613         | 0.880         |
| + - - -  | 0.779         | 0.922         |
| - - - -  | 0.996         | 0.849         |

Compared to overlay: Antigen: ConM

## Supplementary figures 1B

ConM group specific peptides can detect for HIV Specific responses at similar frequencies as ConA and ConD clade specific peptides in CD8+ T-cells

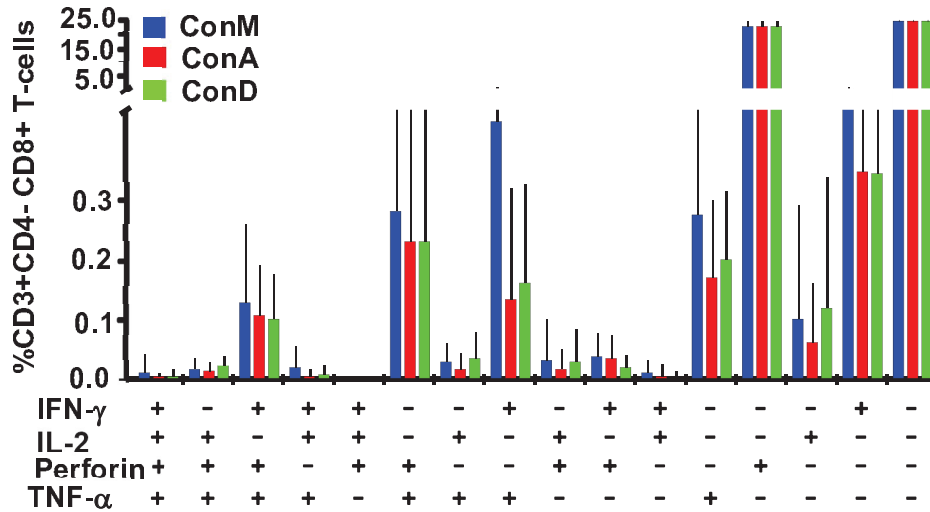

### Student's t-Test Results

| Category | Antigen: ConA | Antigen: ConD |
|----------|---------------|---------------|
| + + + +  | 0.542         | 0.681         |
| - + + +  | 0.535         | 0.547         |
| + - + +  | 0.660         | 0.572         |
| + + - +  | 0.238         | 0.412         |
| + + + -  | 0.343         | 0.343         |
| - - + +  | 0.695         | 0.692         |
| - + - +  | 0.464         | 0.710         |
| + - - +  | 0.069         | 0.090         |
| - + + -  | 0.608         | 0.913         |
| + - + -  | 0.792         | 0.201         |
| + + - -  | 0.449         | 0.198         |
| - - - +  | 0.294         | 0.441         |
| - - + -  | 0.998         | 0.966         |
| - + - -  | 0.587         | 0.849         |
| + - - -  | 0.169         | 0.132         |
| - - - -  | 0.863         | 0.913         |

Compared to overlay: Antigen: ConM

Supplementary figure 2A: Concatenation gates for Perforin FITC titration

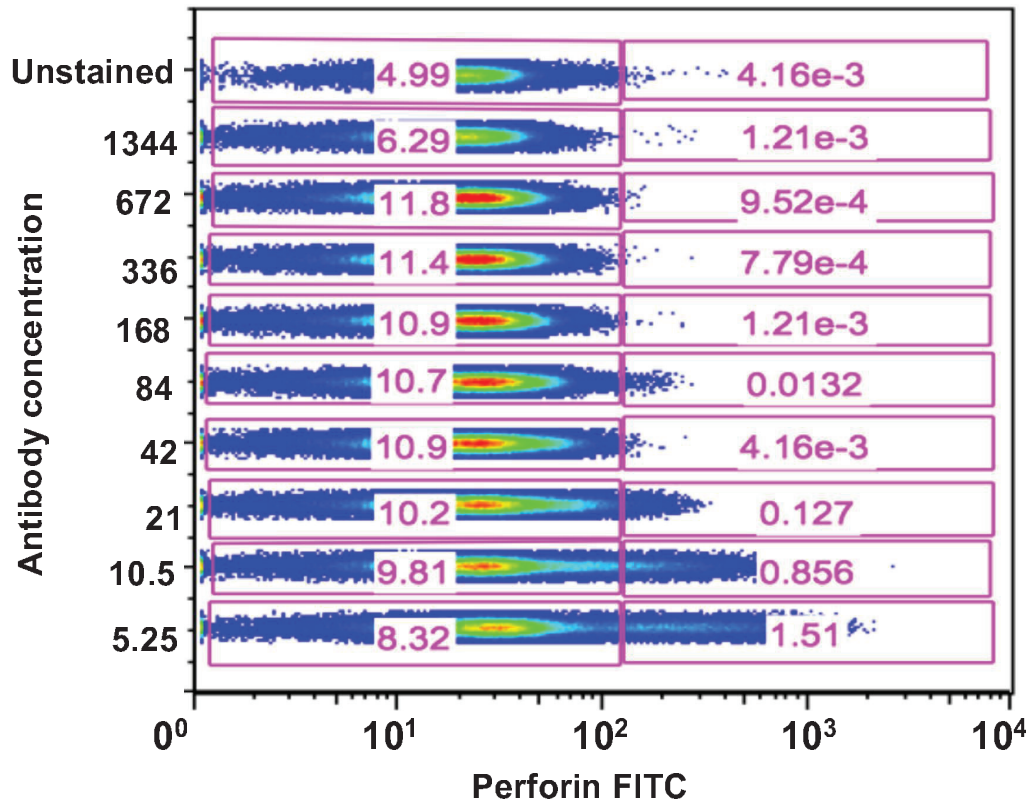

Supplementary figure 2B: Fluorescence Minus One (FMO) gating for perforin

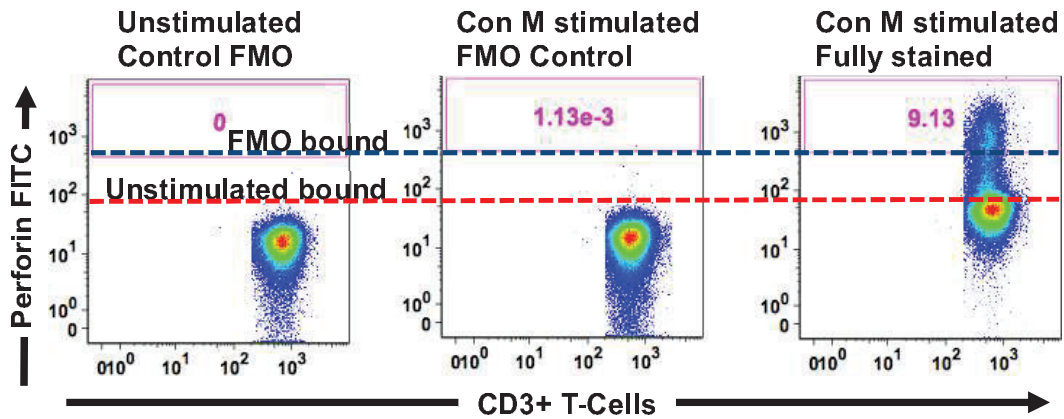

Supplementary Figure 3: Much Higher frequencies of CD4+ and CD8+ T-cells were detected when specimens were stimulated with SEB superantigen

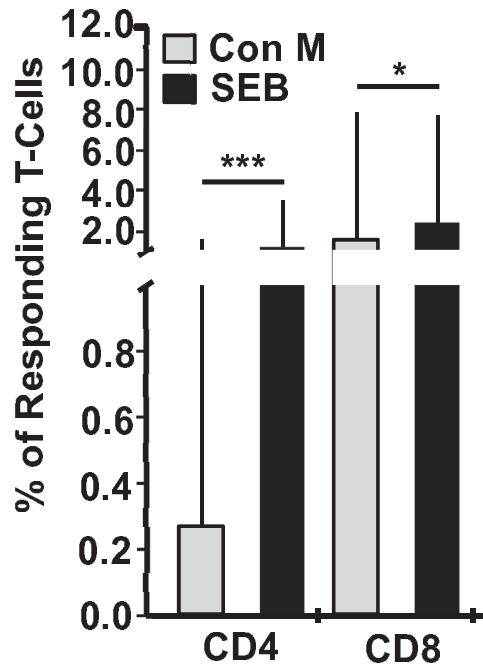

Supplement: mmc1.pdf [file mmc1.pdf]
